# Supplementary material
Source: publisher figshare collection journal article supplement (https://aacr.figshare.com/articles/dataset/_/23391281)
Supplement: Supplementary file 1 [file 41119886]

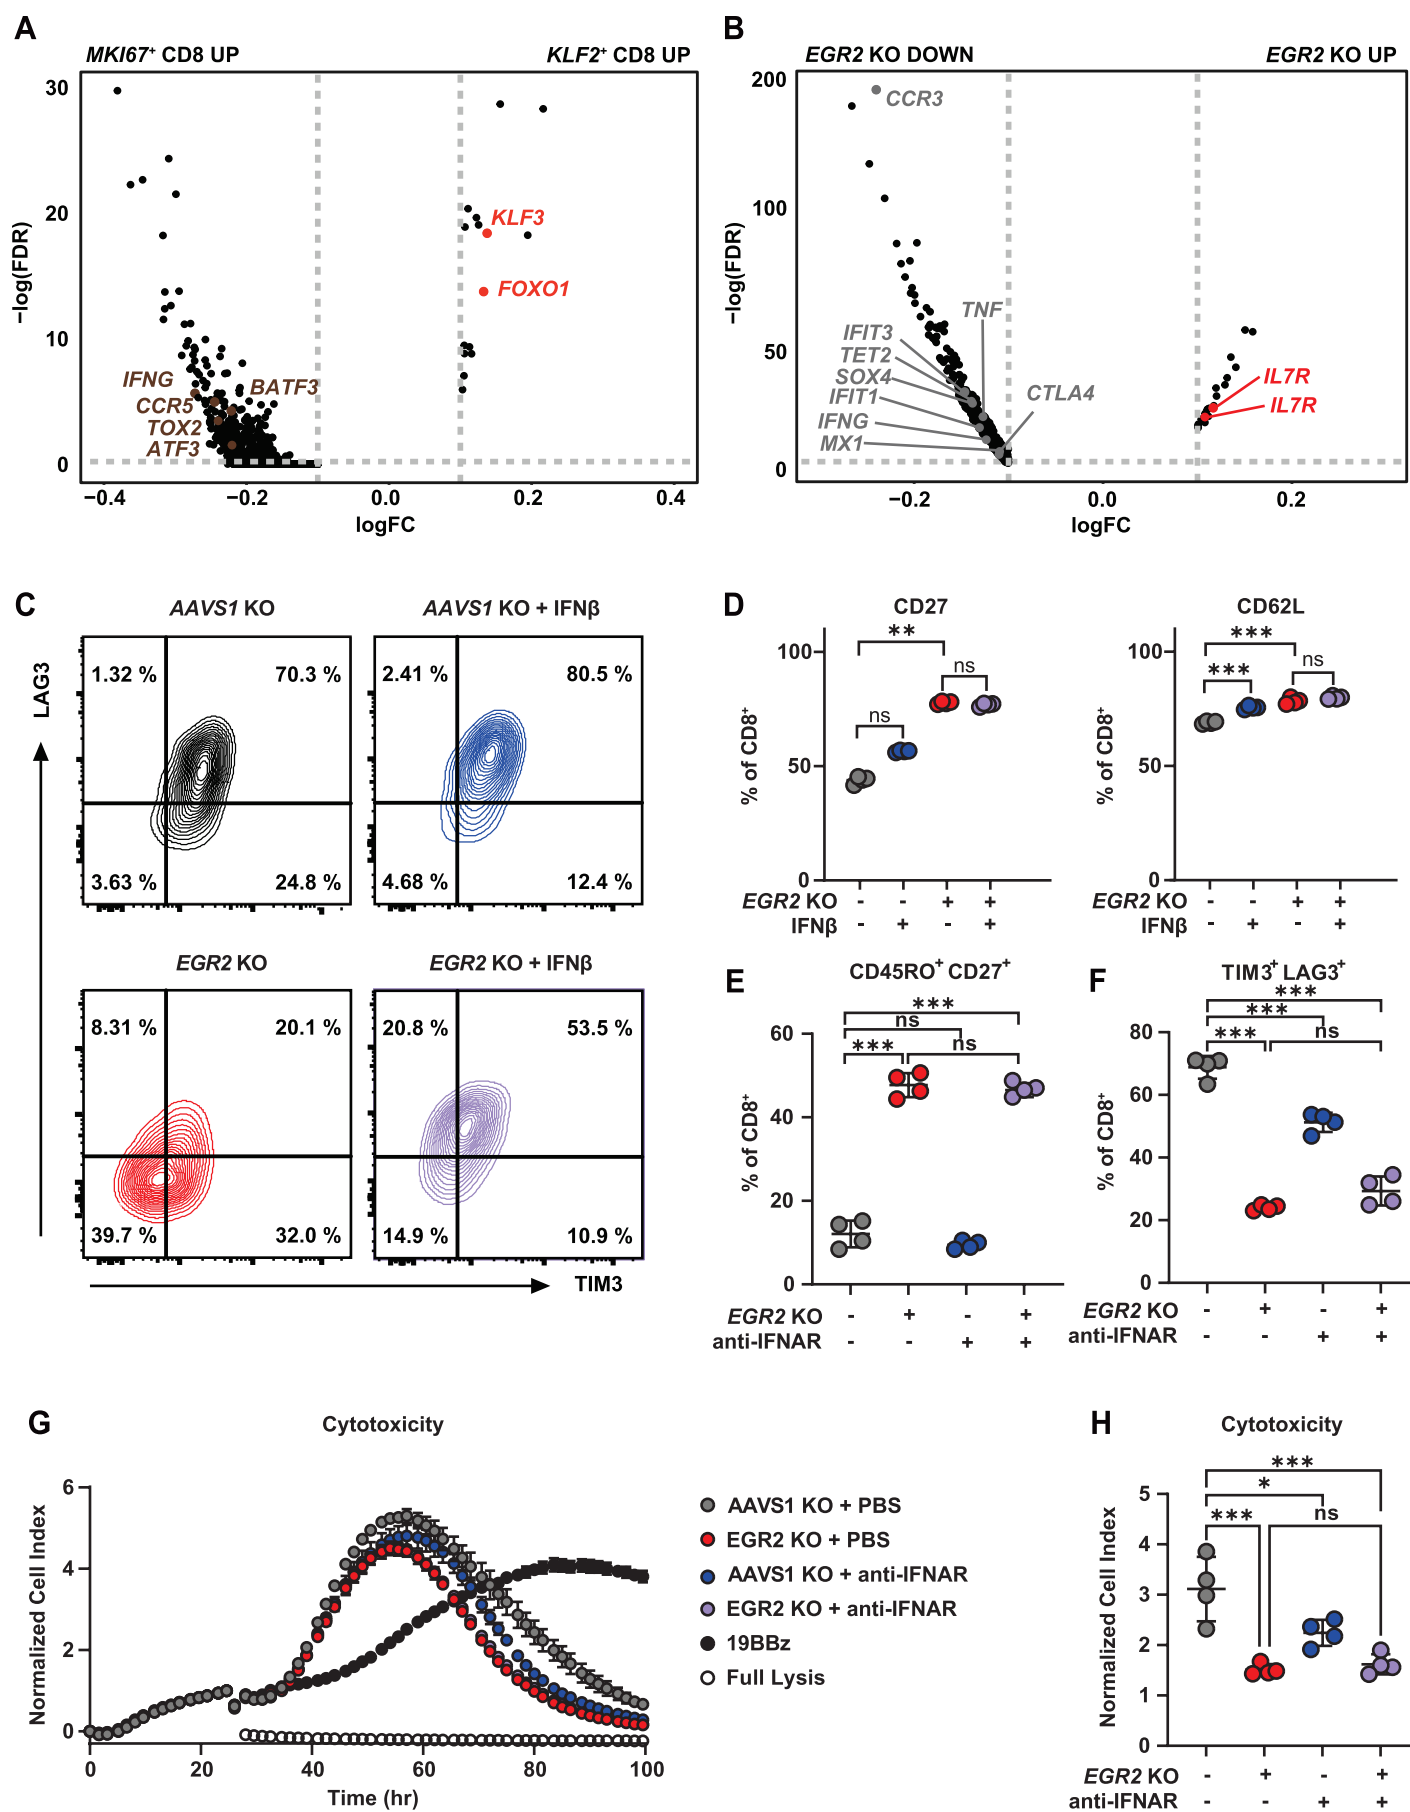

**Supplementary Figure 9. Epigenetic remodeling of CAR T-cells by *EGR2* knockout and effect of type I IFN signaling on the development of memory and exhaustion.** **A**, Volcano plots showing differentially accessible chromatin regions within genes between *KLF2*<sup>+</sup> and *MKI67*<sup>+</sup> CD8<sup>+</sup> T-cells. **B**, Volcano plots depicting differentially accessible chromatin regions within genes between *EGR2* and *AAVS1* knockout (KO) CD8<sup>+</sup> CAR T-cells. **C**, Representative contour plots showing frequencies of TIM3- and LAG3-expressing CD8<sup>+</sup> CAR-T cells after exposure to IFN $\beta$  (1ng/mL) following chronic CAR stimulation. **D**, Proportions of CD27<sup>+</sup> (left) or CD62L<sup>+</sup> (right) CD8<sup>+</sup> CAR-T cells after exposure to IFN $\beta$ . **E**, Representative contour plots showing frequencies of CD45RO<sup>+</sup>CD27<sup>+</sup> CD8<sup>+</sup> CAR-T cells after IFNAR blockade (Anifrolumab, 1 $\mu$ g/mL) during chronic antigen stimulation. **F**, Frequencies of TIM3<sup>+</sup>LAG3<sup>+</sup> CD8<sup>+</sup> CAR-T cells after IFNAR blockade. **G**, Cytolytic capacity of CAR T-cells as measured by normalized cell index kinetics using the xCELLigence real-time cytotoxicity assay following chronic stimulation with target cancer cells in the setting of either IFN $\beta$  or IFNAR blockade. **H**, Normalized cell index at 75 hours after challenge with target cancer cells. All experiments were conducted using healthy donor T-cells from independent donors (Mann-Whitney test,  $n = 4$ ). \* $P < 0.05$ , \* $P < 0.01$ , \*\*\* $P < 0.001$ , ns.: not significant.
